# Supplementary material for: Population Subdivision and Migration Intensity Assessment of Mangalica Pig Breeds Based on Pedigree Analysis
Source: Preprints.org preprint supplement (doi:10.20944/preprints202312.1040.v1), 2023-12-14
Supplement: Supplementary file 1 [file supplementary]

**Supplementary Materials**


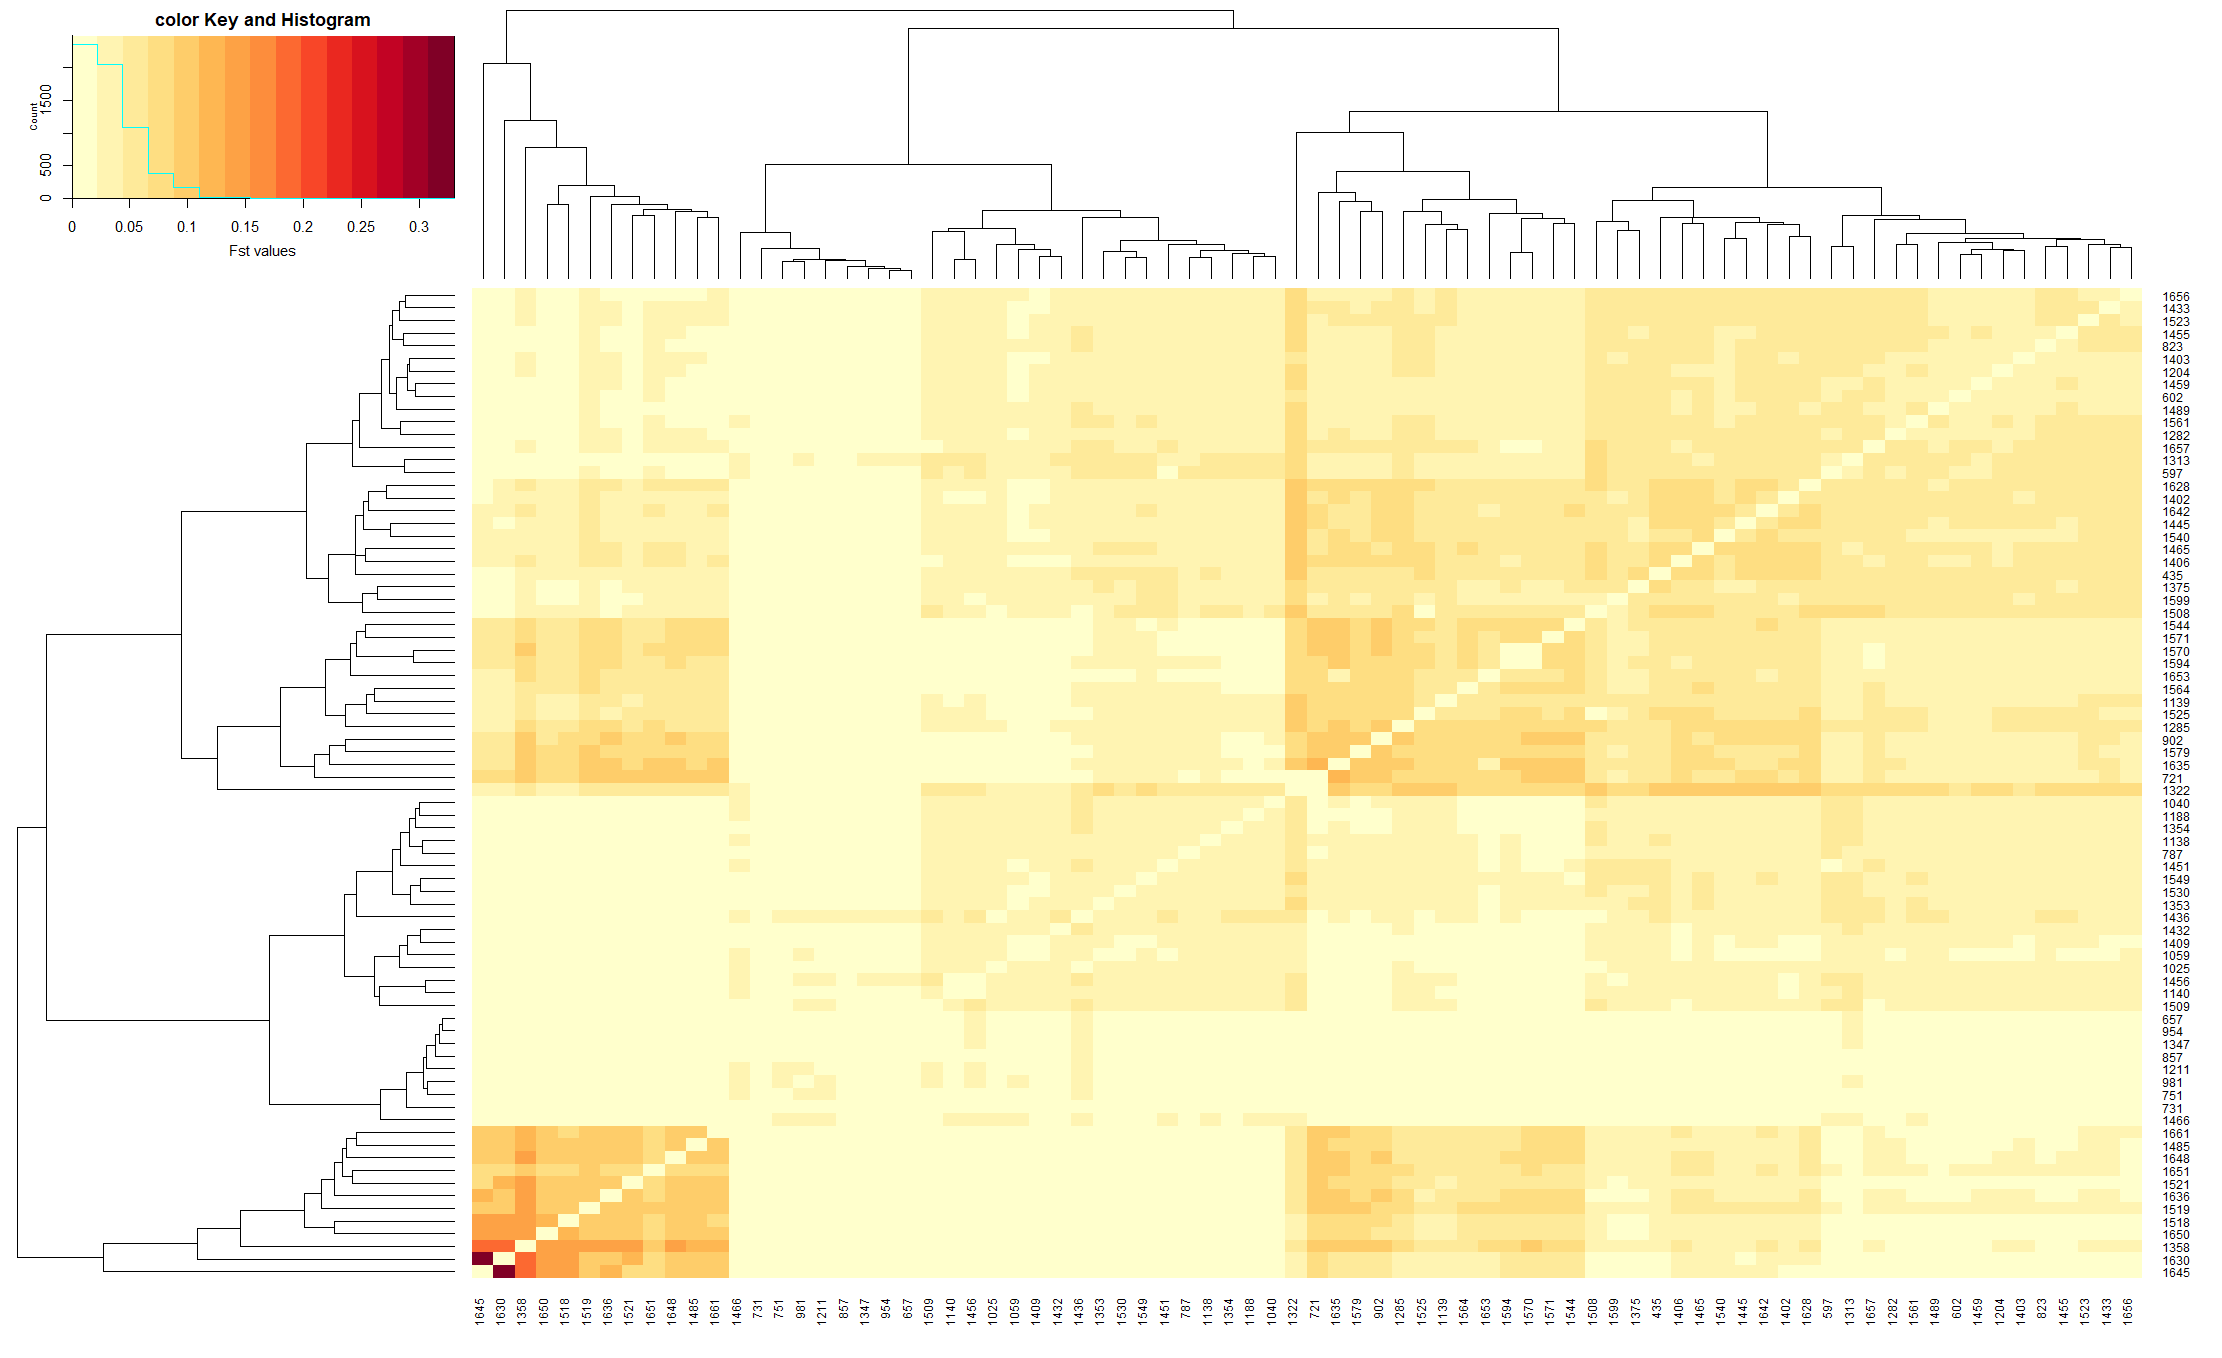

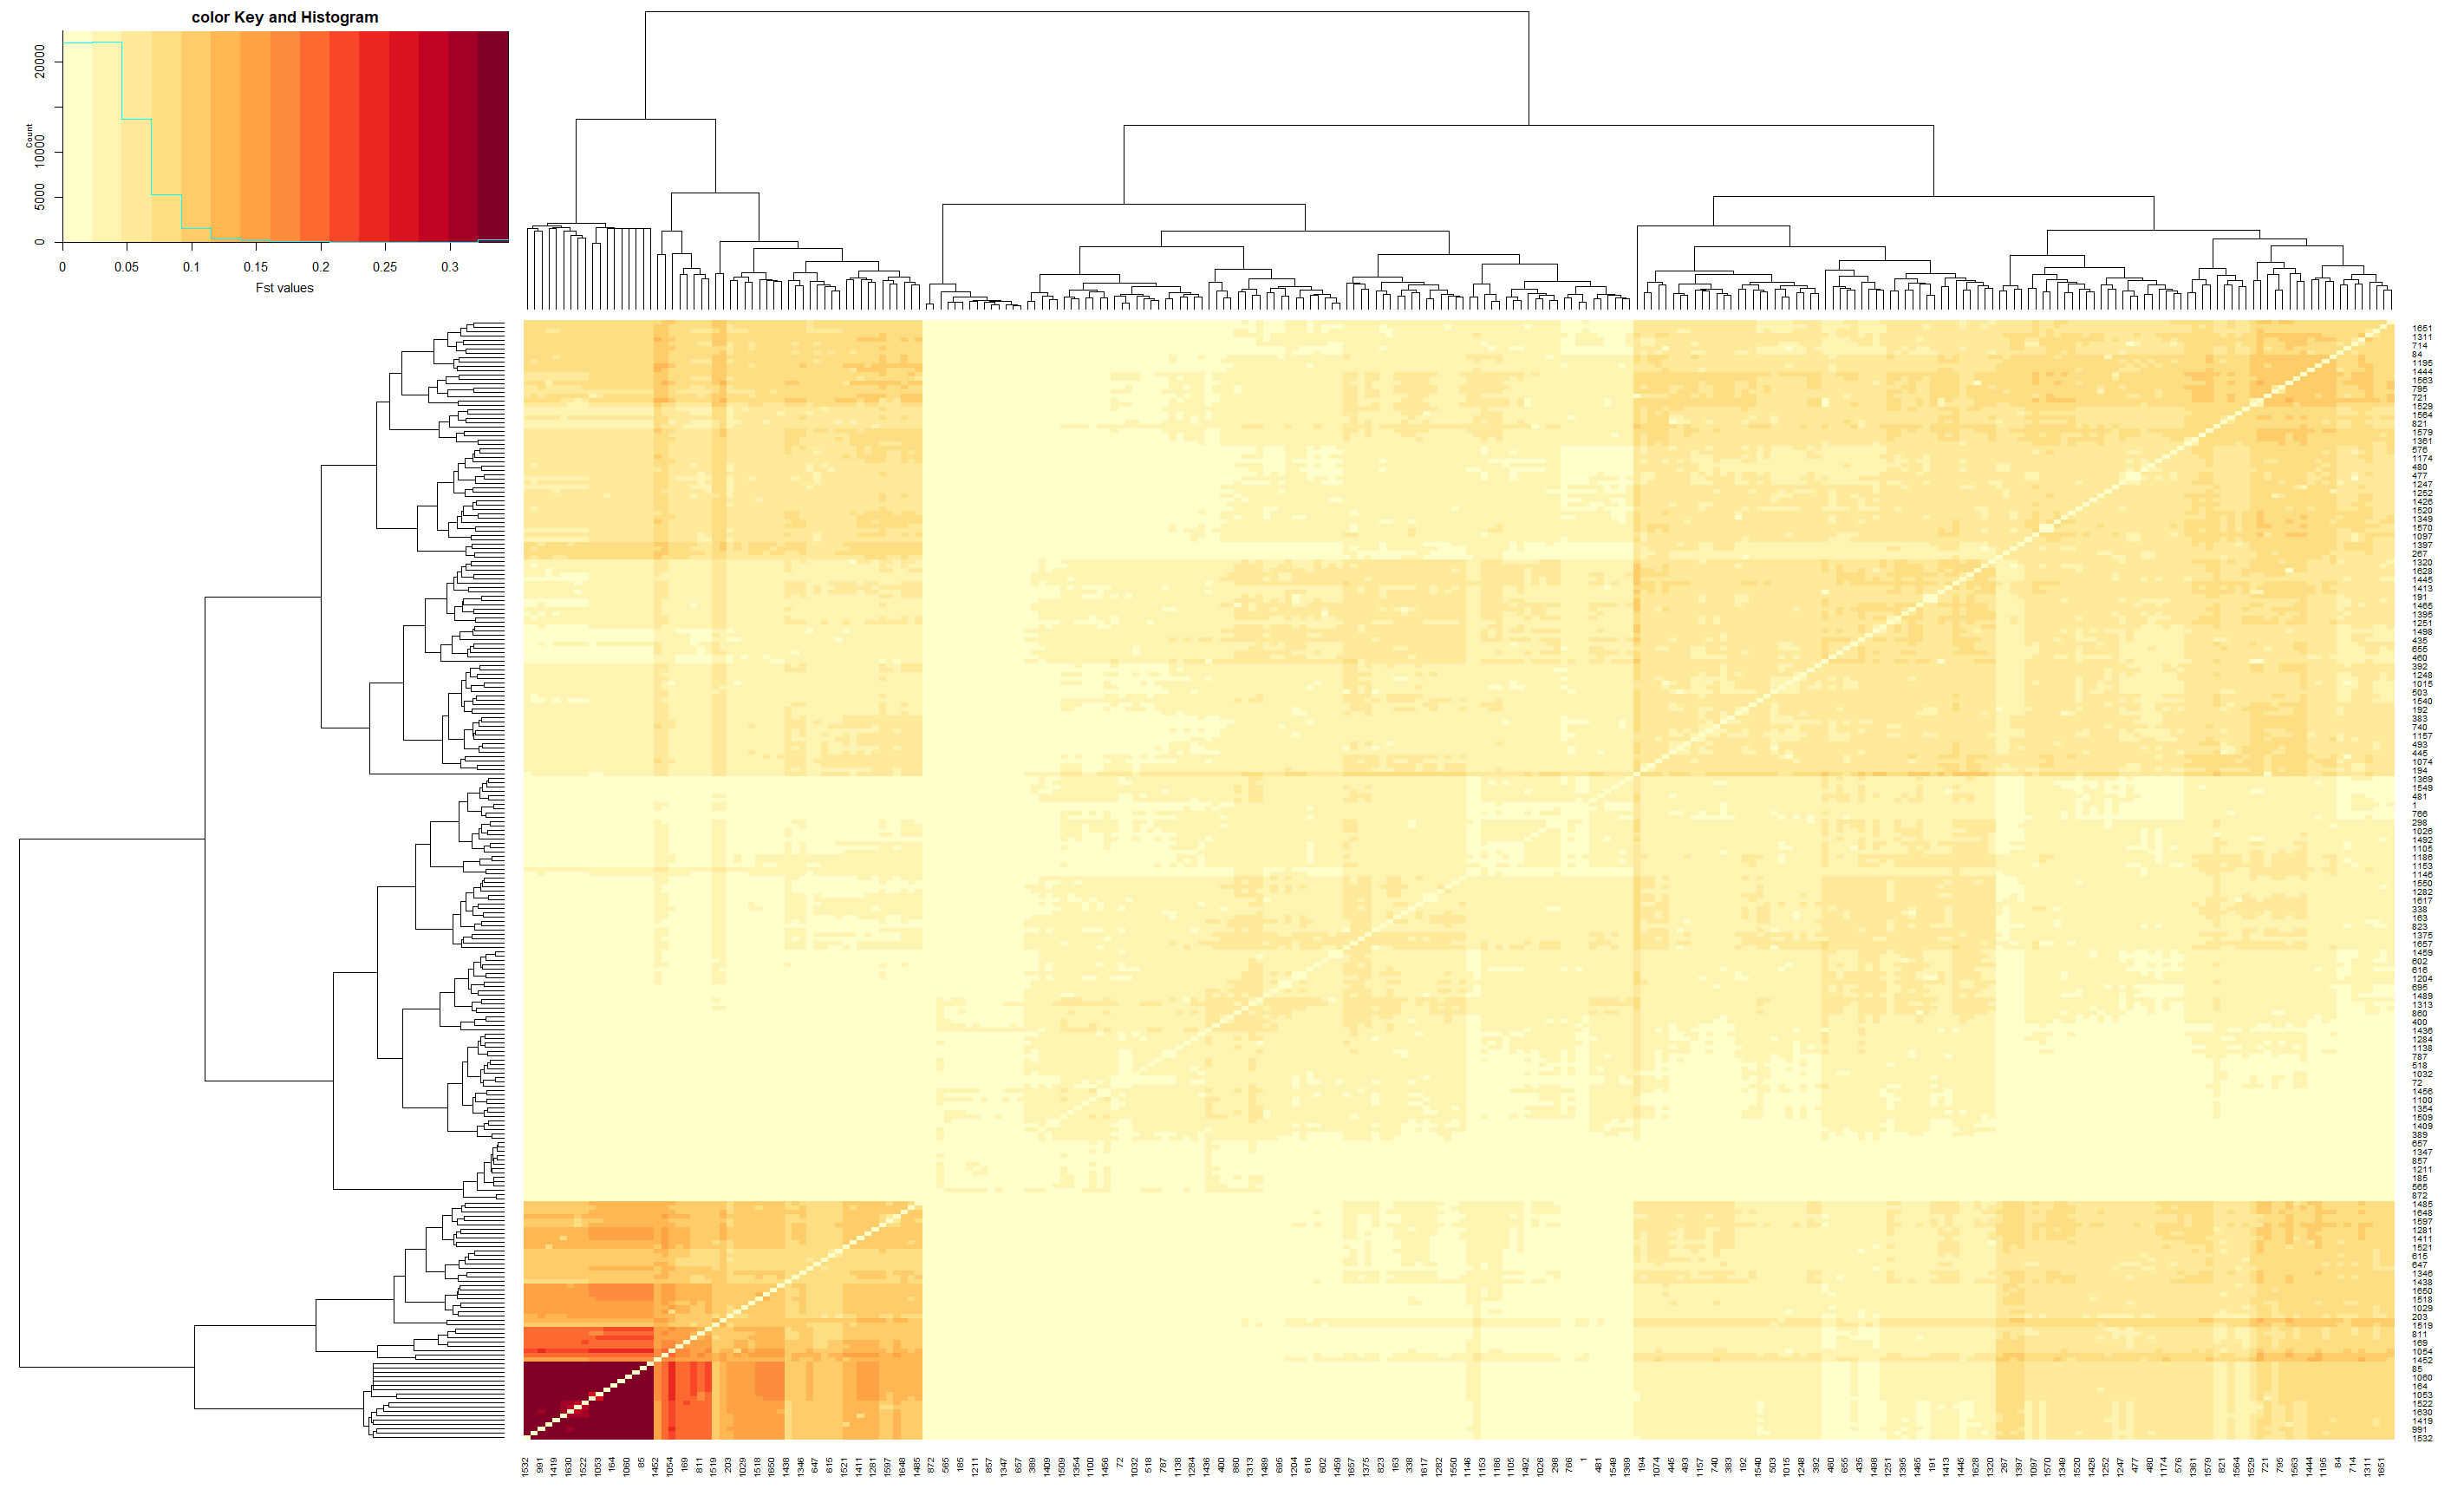


Figure S1b. Heatmap and dendrogram based on pairwise FST values among the active herds of Blonde Mangalica breed. The heatmap color key and histogram represents the FST matrix considering different discrete FST scales.

Figure S1a. Heatmap and dendrogram based on pairwise FST values among the herds of Blonde Mangalica breed. The heatmap color key and histogram represents the FST matrix considering different discrete FST scales.

| 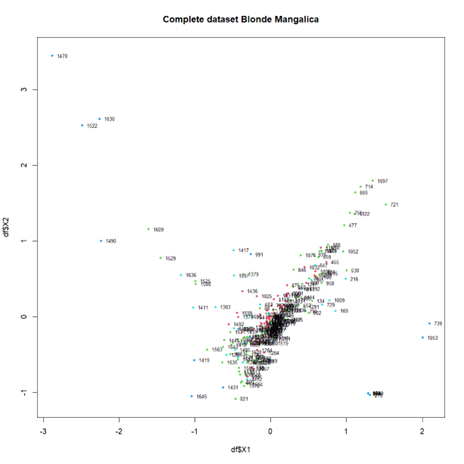  Figure S2a. Multidimensional scaling (MDS) clusters (MDS1&MDS2) of the Blonde Mangalica | 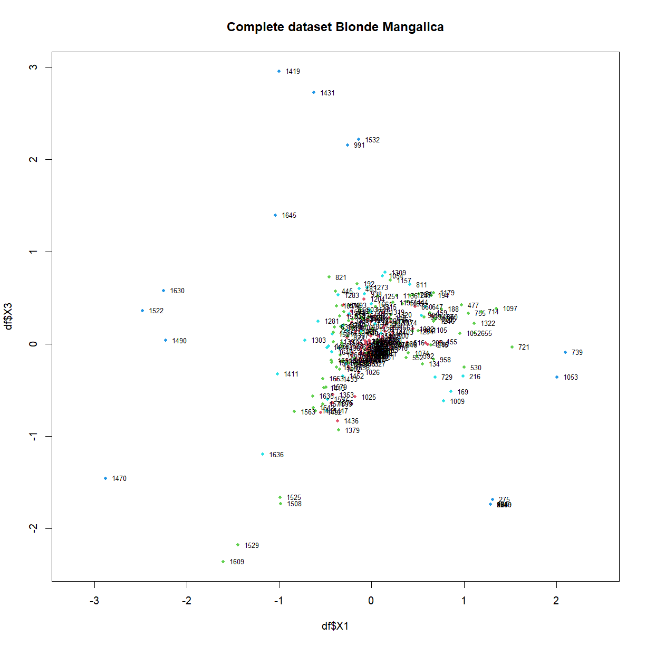  Figure S2b. Multidimensional scaling (MDS) clusters (MDS1&MDS3) of the Blonde Mangalica |
| --- | --- |
| 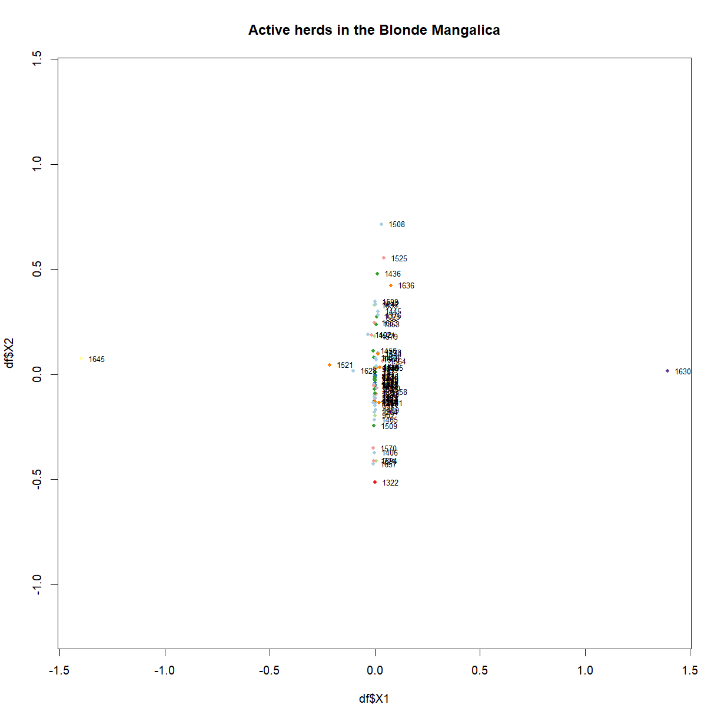  Figure S2c. Multidimensional scaling (MDS) clusters (MDS1&MDS2) of active herds in the Blonde Mangalica | 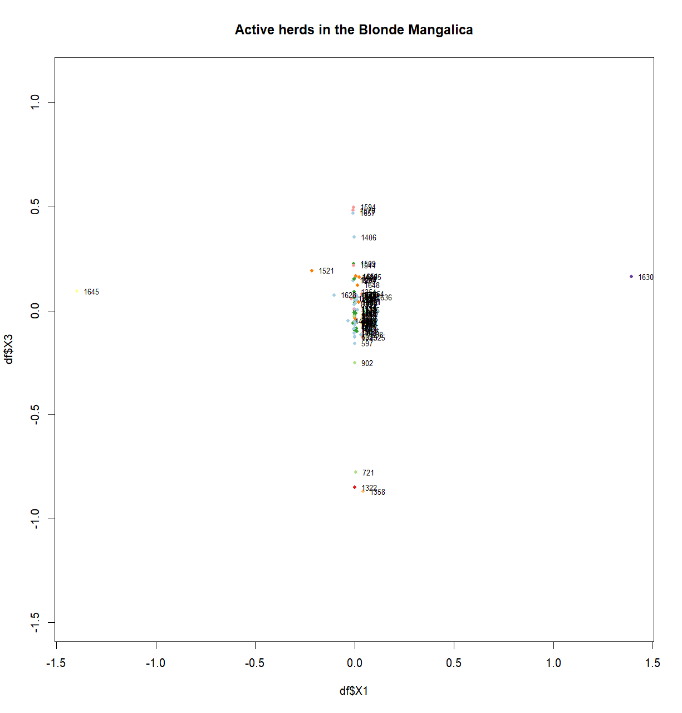  Figure S2d. Multidimensional scaling (MDS) clusterst (MDS1&MDS3) of active herds in the Blonde Mangalica |

| 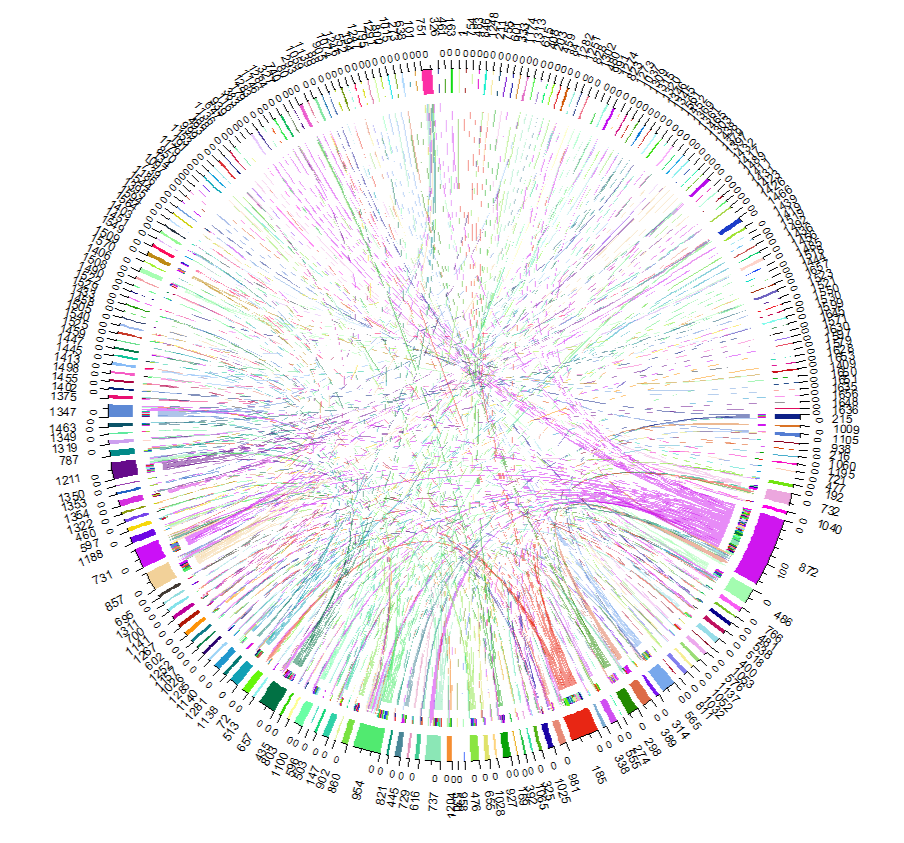  Figure S3a. Male migration intensity of the Blonde's total herds | 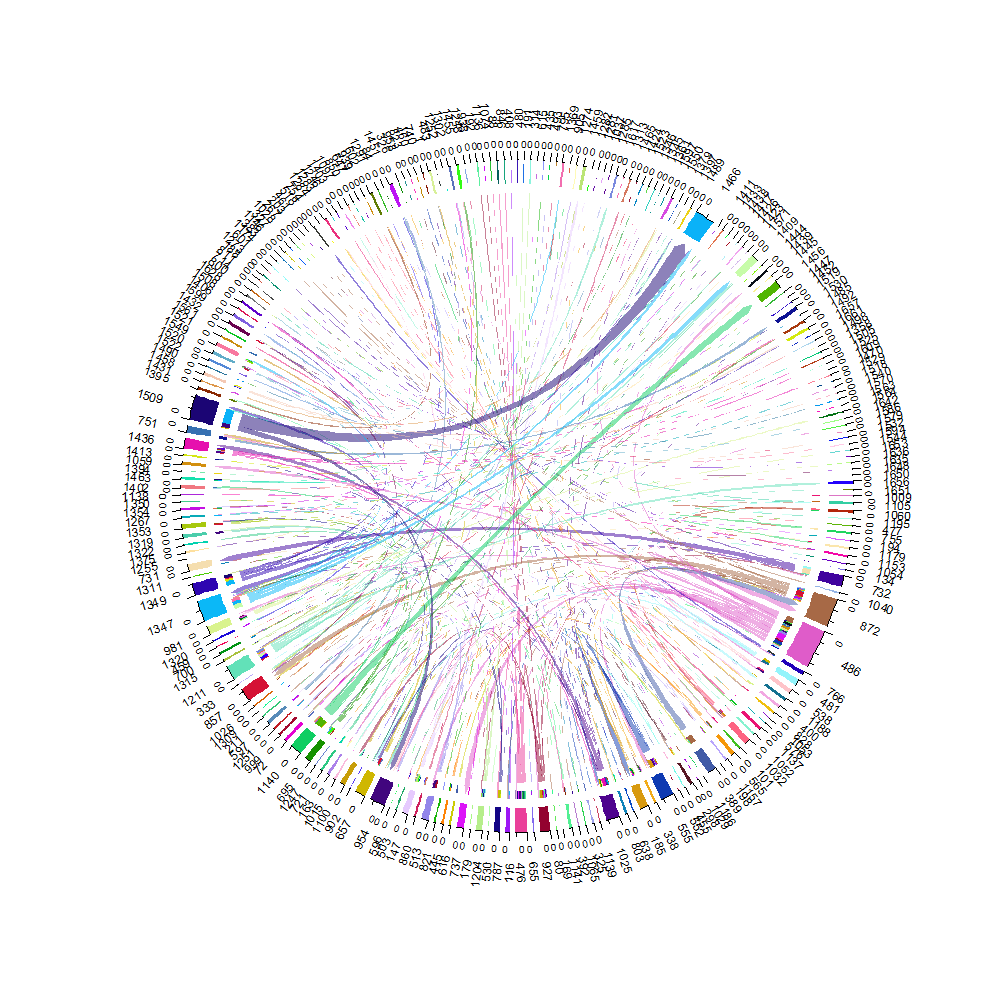  Figure S3b. Female migration intensity of the Blonde's total herds |
| --- | --- |
| 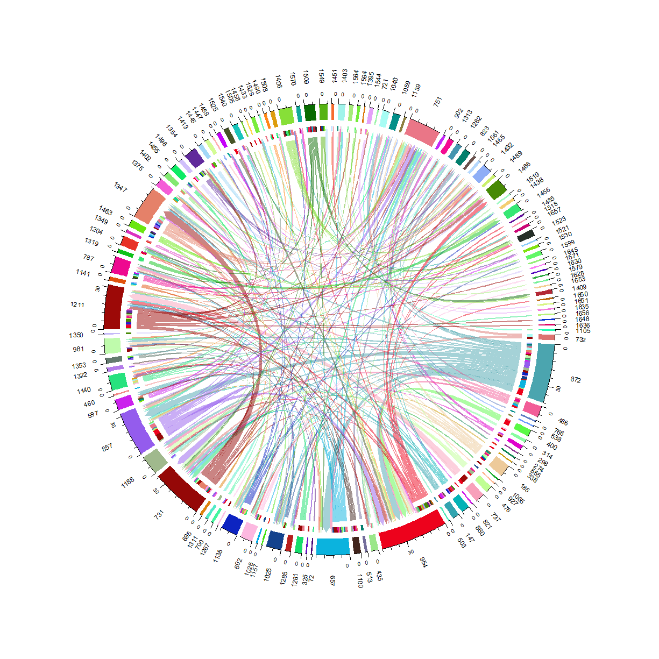  Figure S3c. Male migration intensity of the Blonde's active herds | 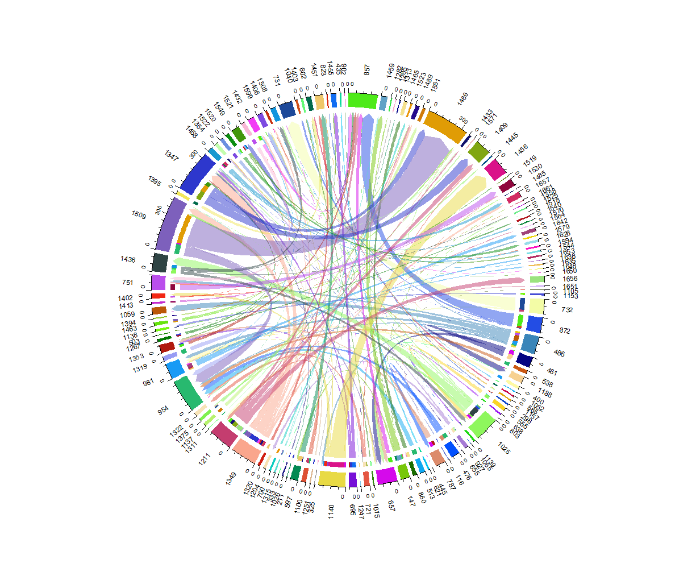  Figure S3d. Female migration intensity of the Blonde's current active farms |


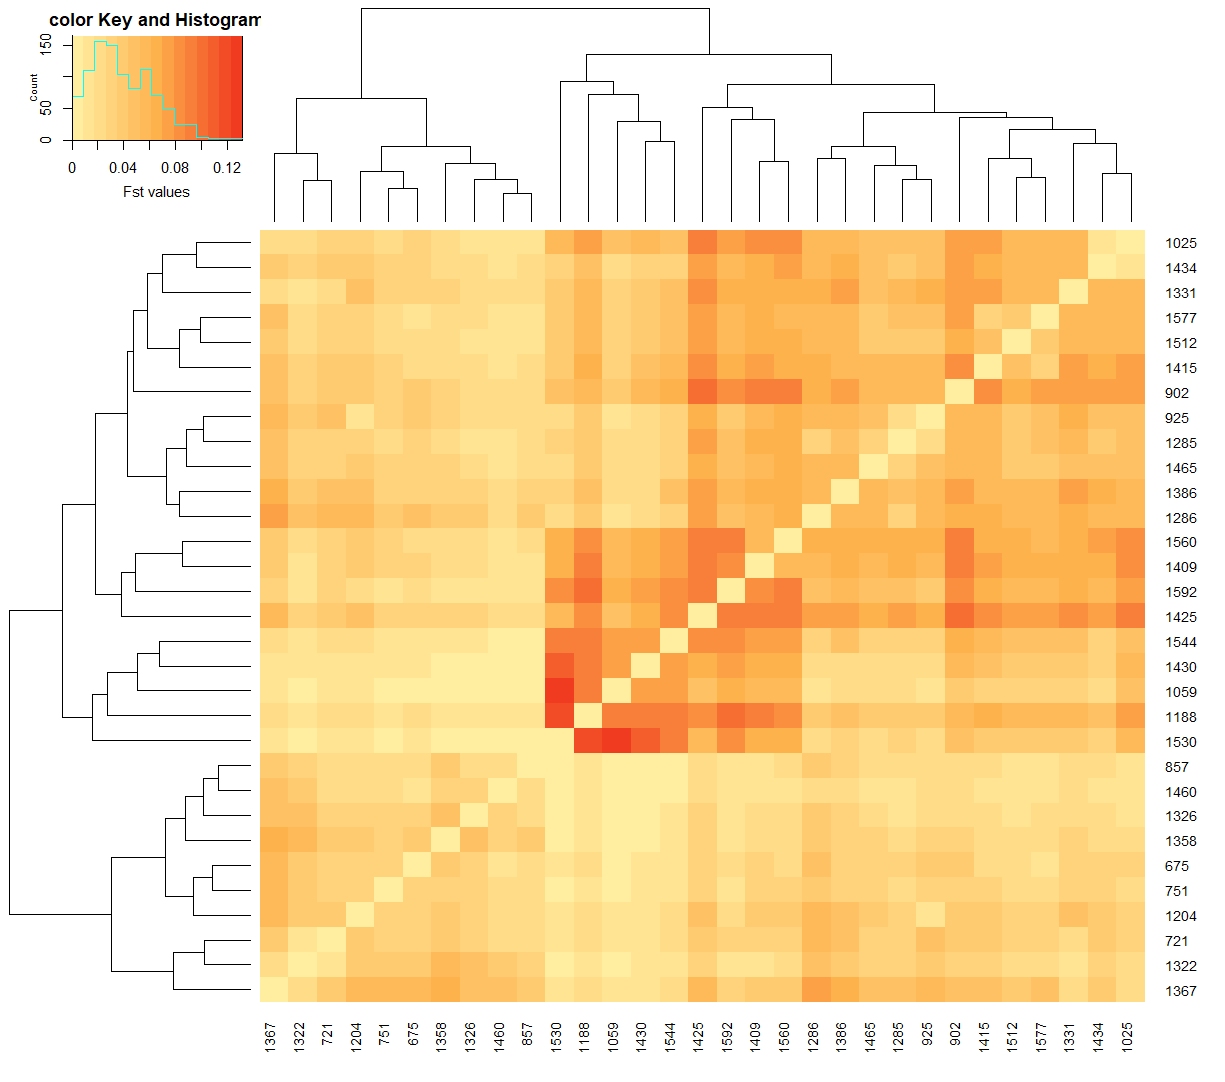

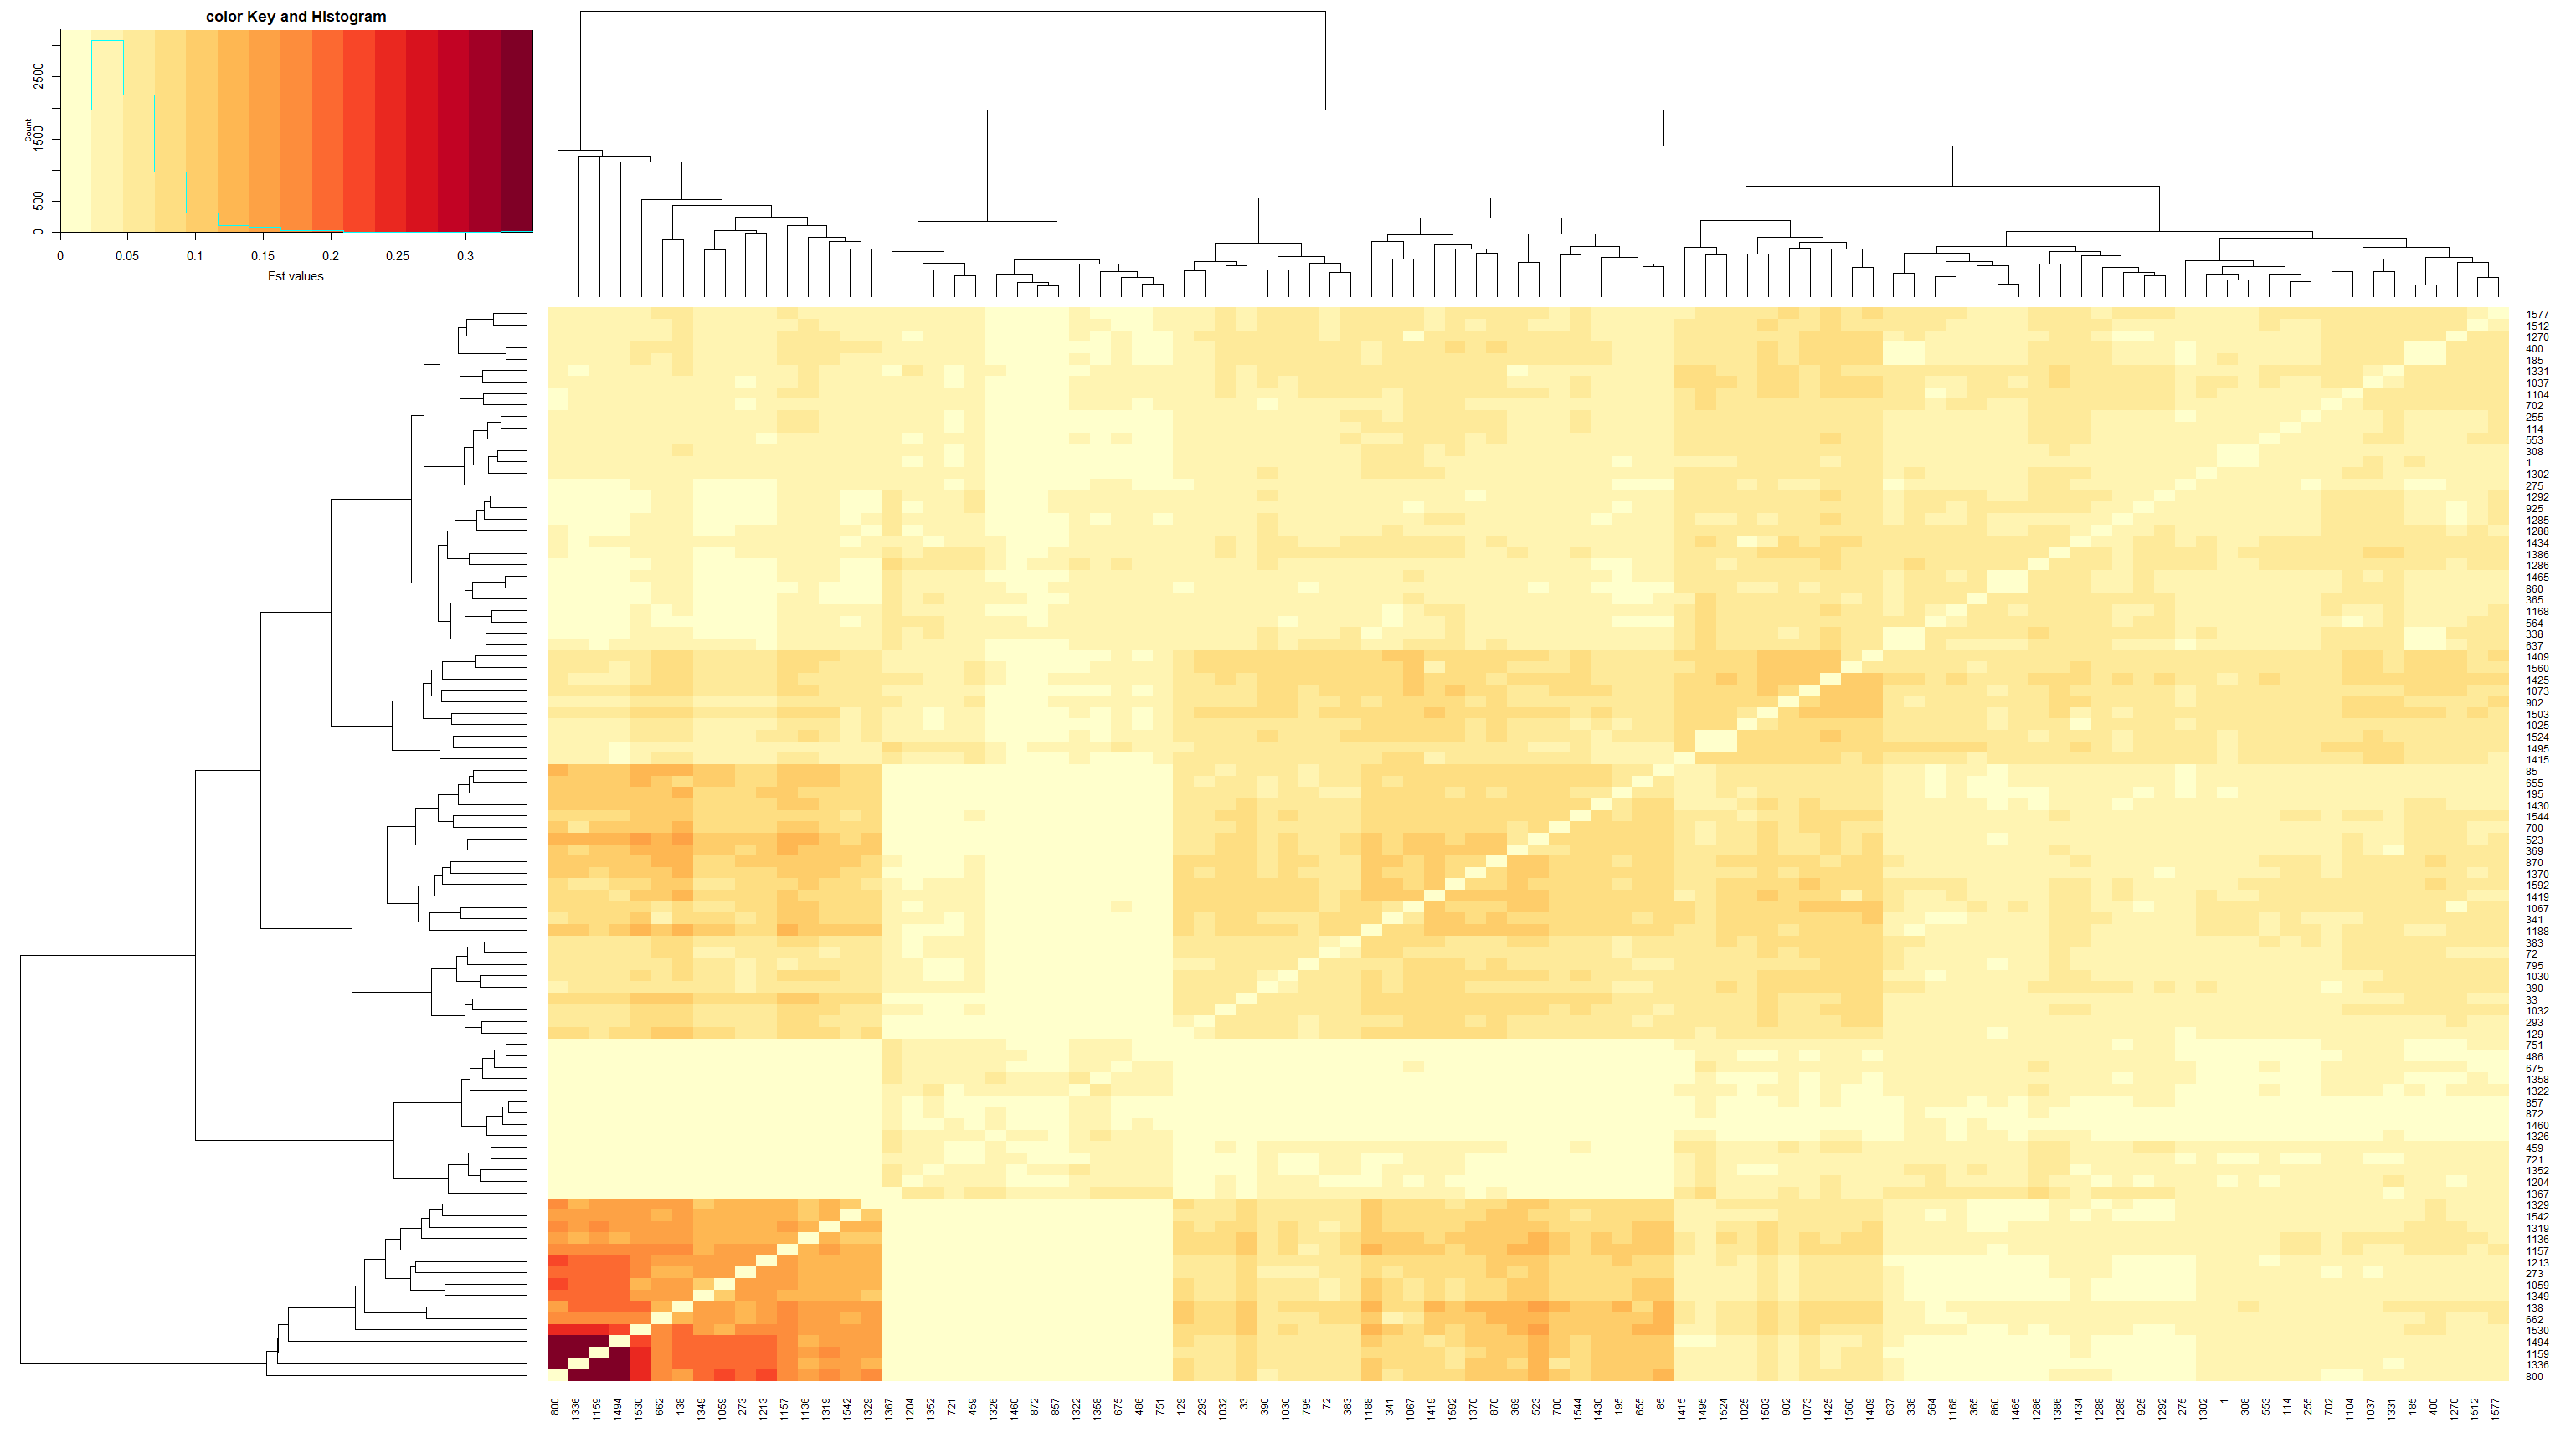


Figure S4a. Heatmap and dendrogram based on pairwise FST values among the herds of Swallow-Belly Mangalica breed. The heatmap color key and histogram represents the FST matrix considering different discrete FST scales.

Figure S4b. Heatmap and dendrogram based on pairwise FST values among the active herds of Swallow-Belly Mangalica breed. The heatmap color key and histogram represents the FST matrix considering different discrete FST scales.

| 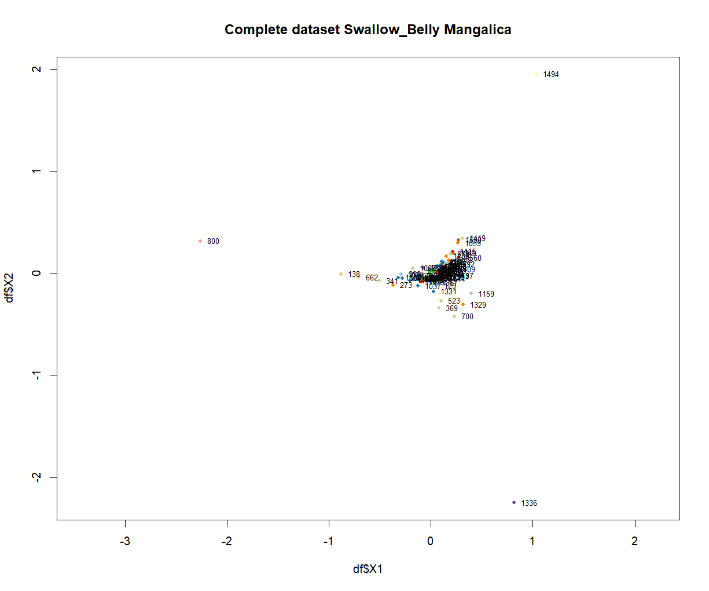  Figure S5a. Multidimensional scaling (MDS) clusters (MDS1&MDS2) of the Swallow_Belly Mangalica | **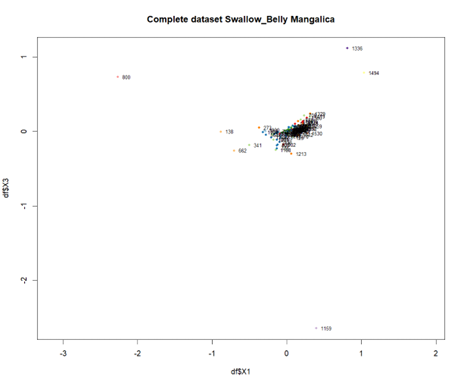**  Figure S5b. Multidimensional scaling (MDS) clusters (MDS1&MDS3) of the Swallow_Belly Mangalica |
| --- | --- |
| 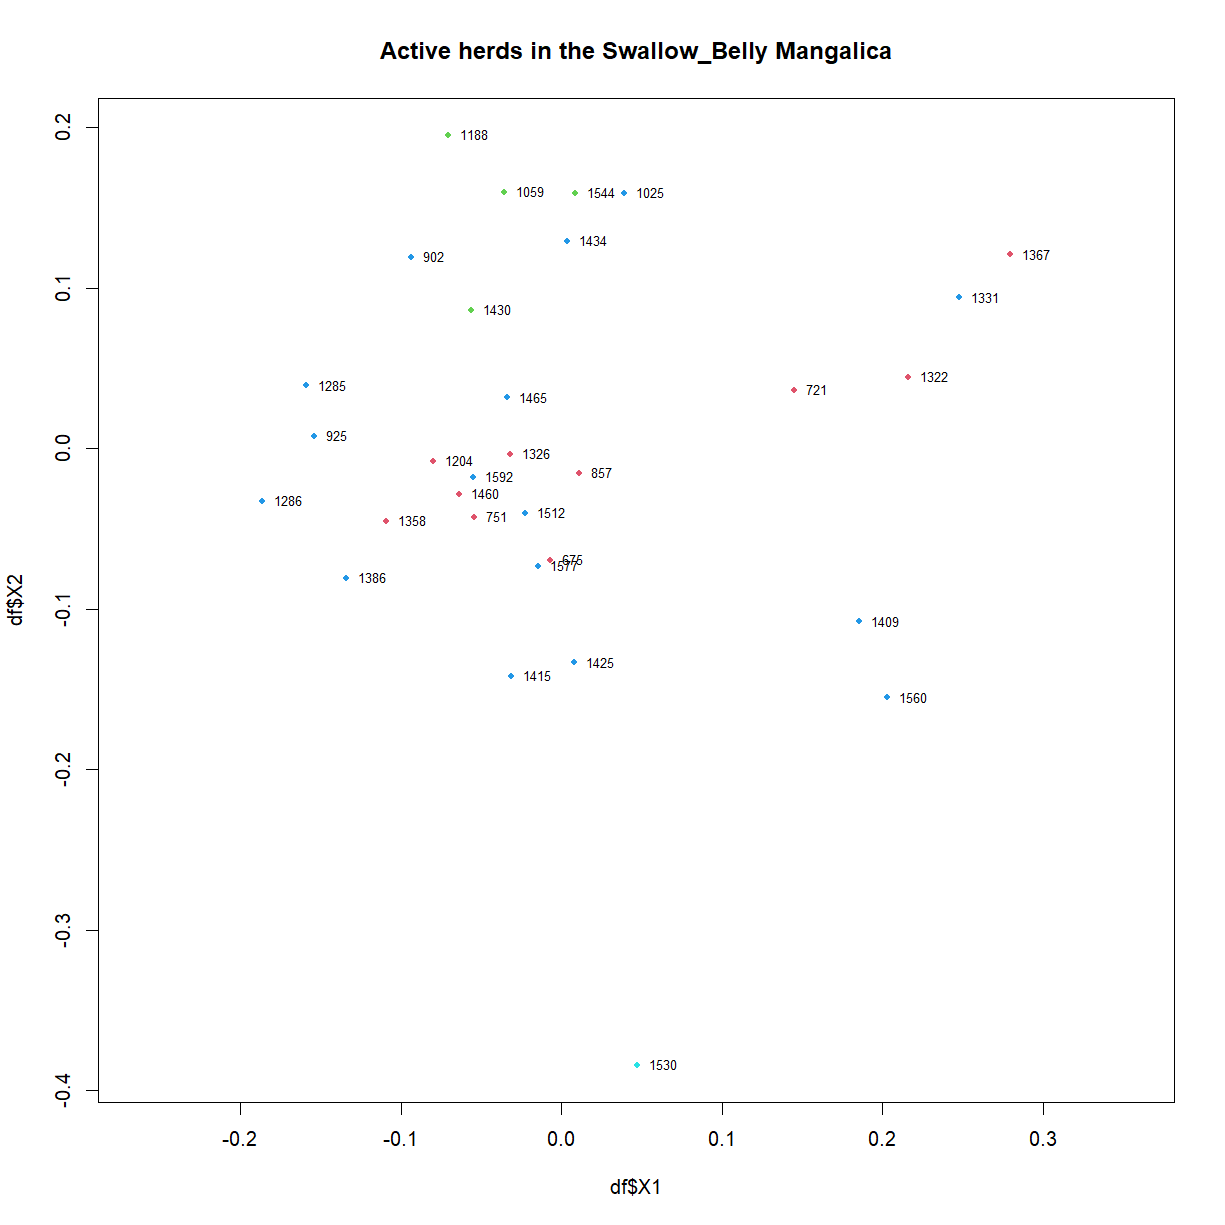  Figure S5c. Multidimensional scaling (MDS) clusters (MDS1&MDS2) of active herds the Swallow_Belly Mangalica | 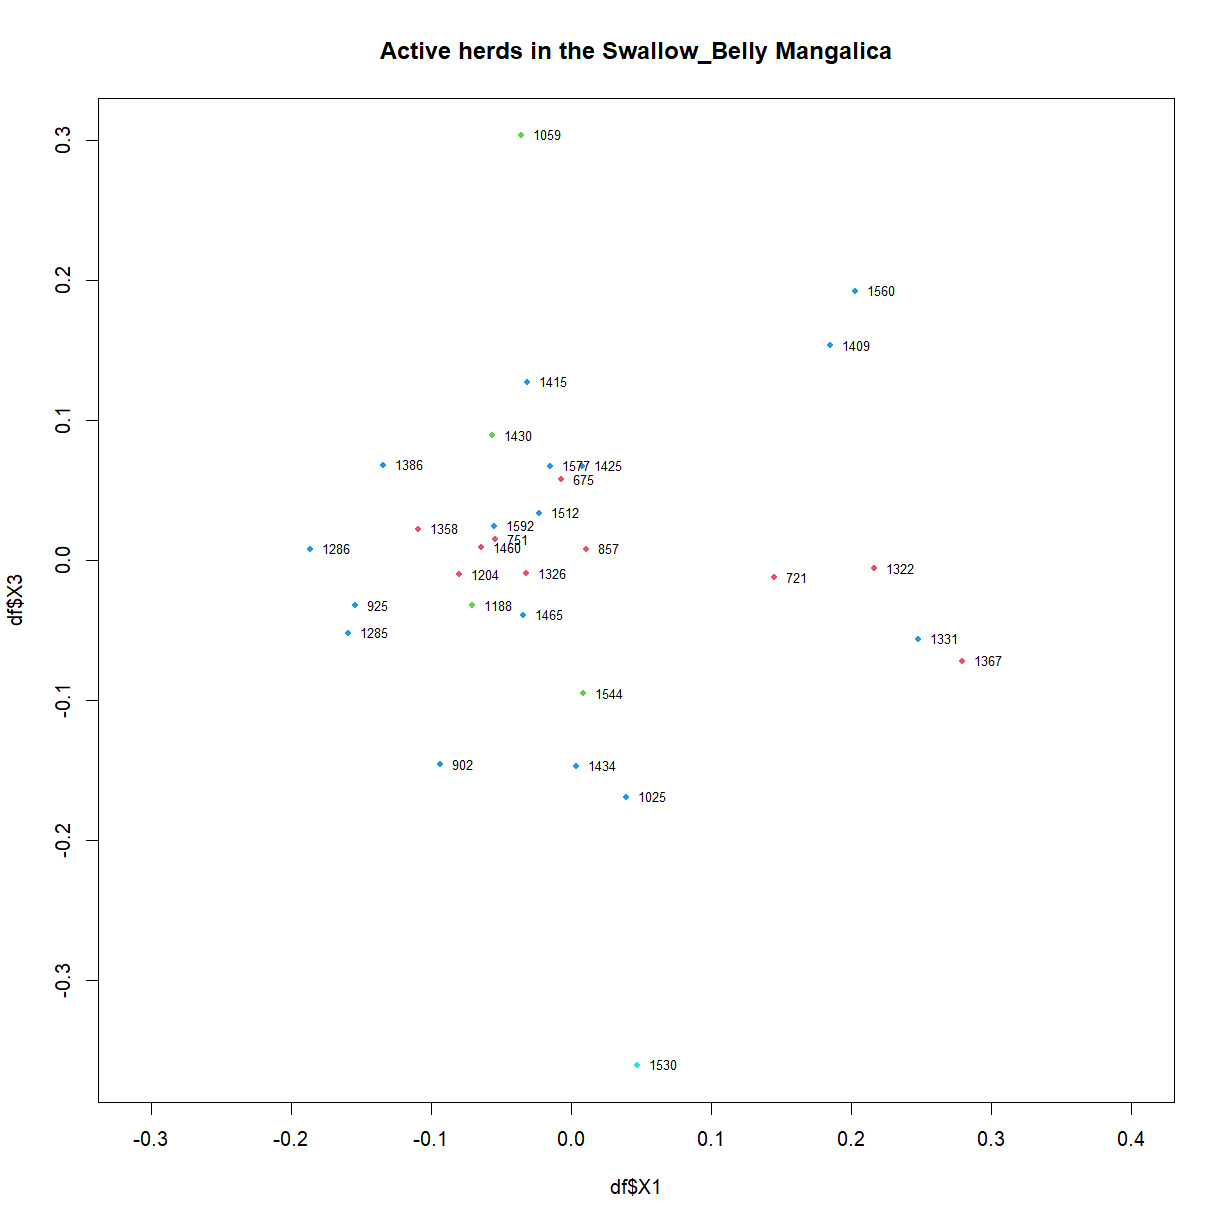  Figure S5d. Multidimensional scaling (MDS) clusters (MDS1&MDS3) of active herds the Swallow_Belly Mangalica |

| 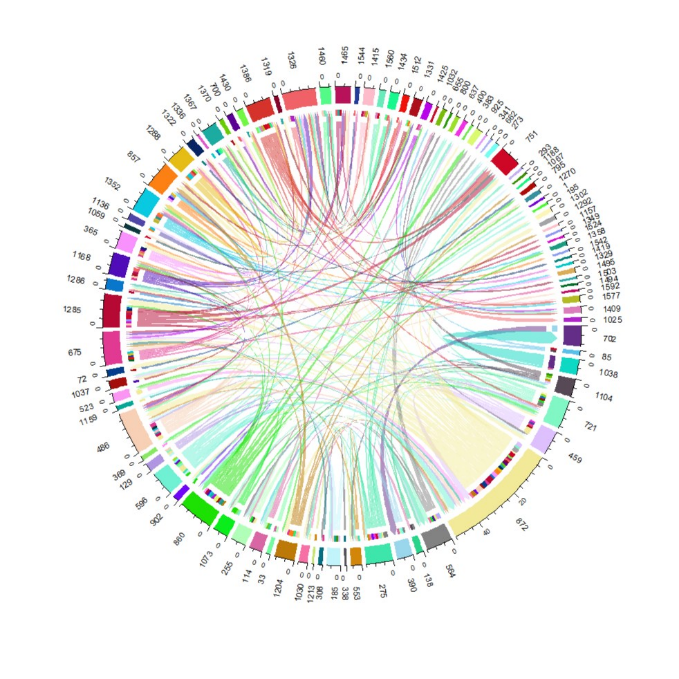  Figure S6a. Male migration intensity of the Swallow_Belly's total herds | 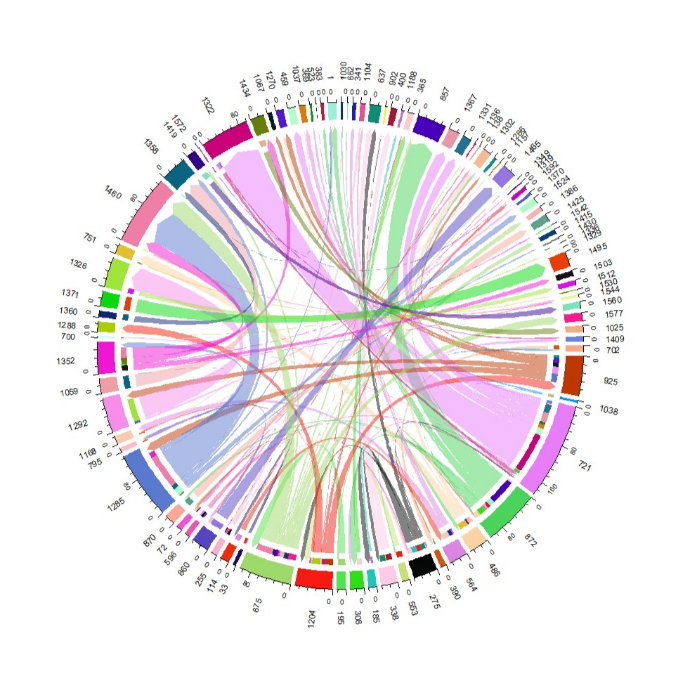  Figure S6b. Female migration intensity of the Swallow_Belly's total herds |
| --- | --- |
| 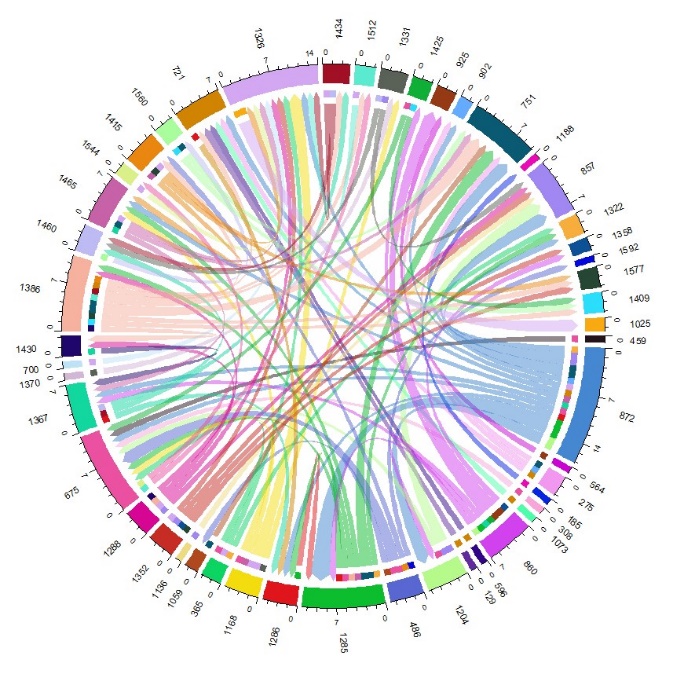  Figure S6c. Male migration intensity of the Swallow_Belly's active herds | 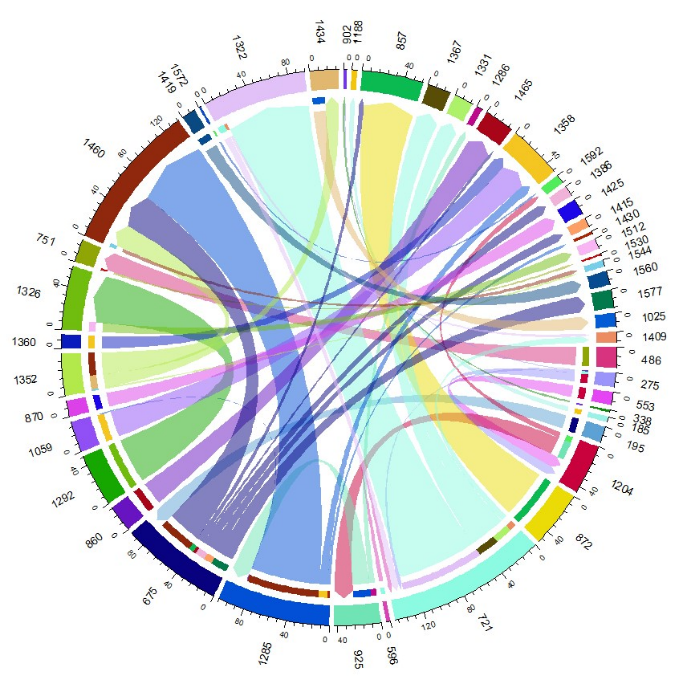  Figure S6d. Female migration intensity of the Swallow_Belly's active herds |


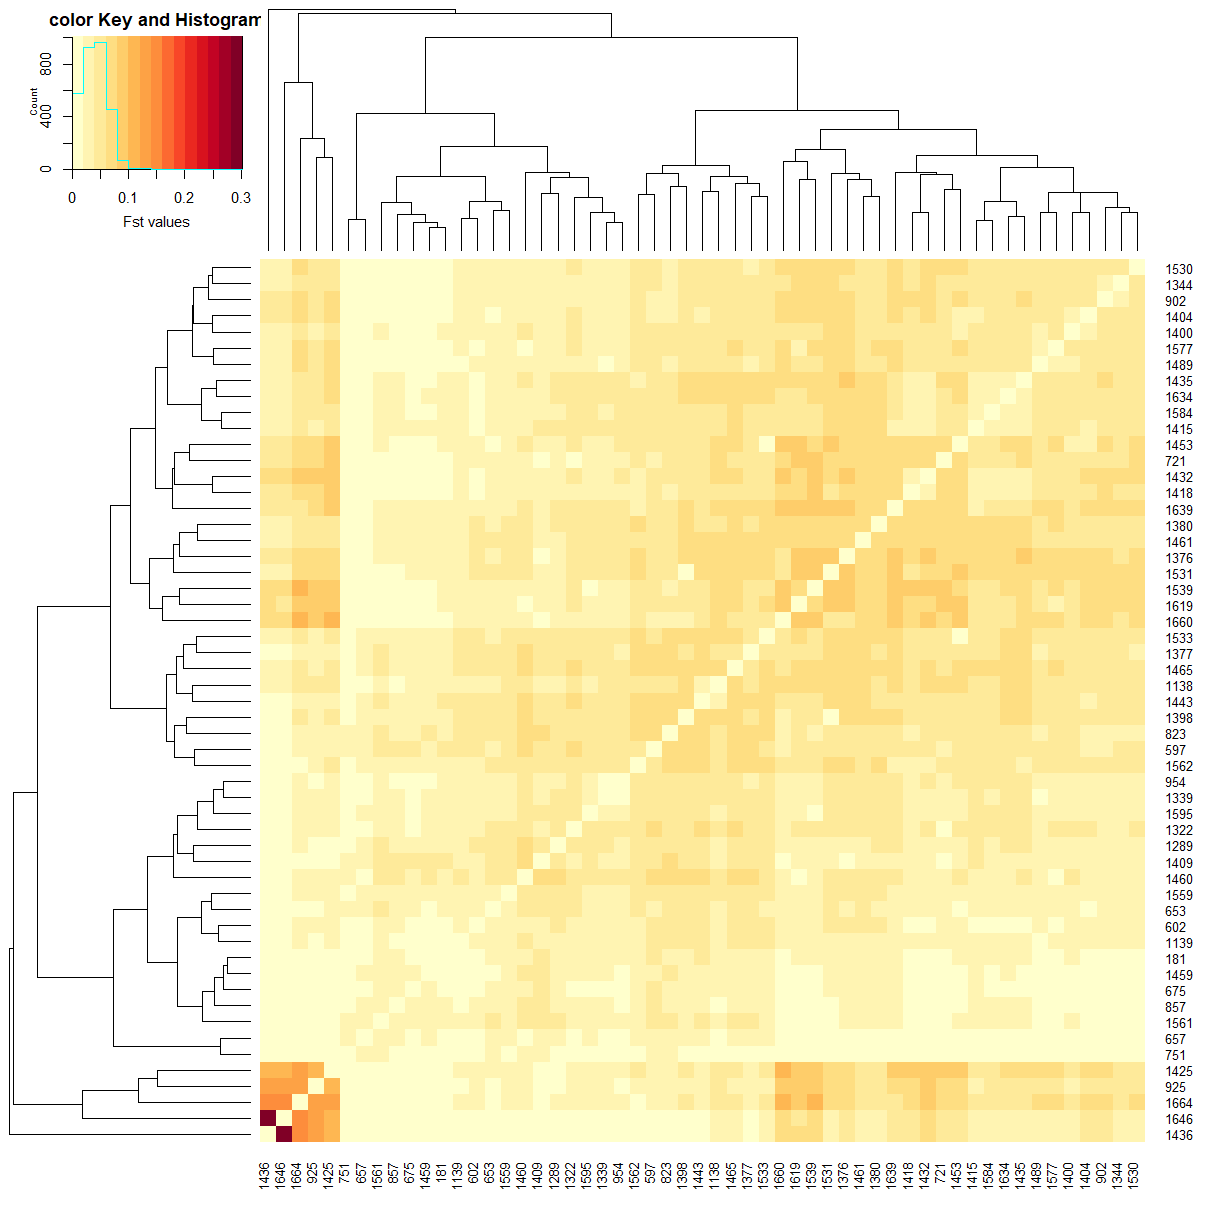

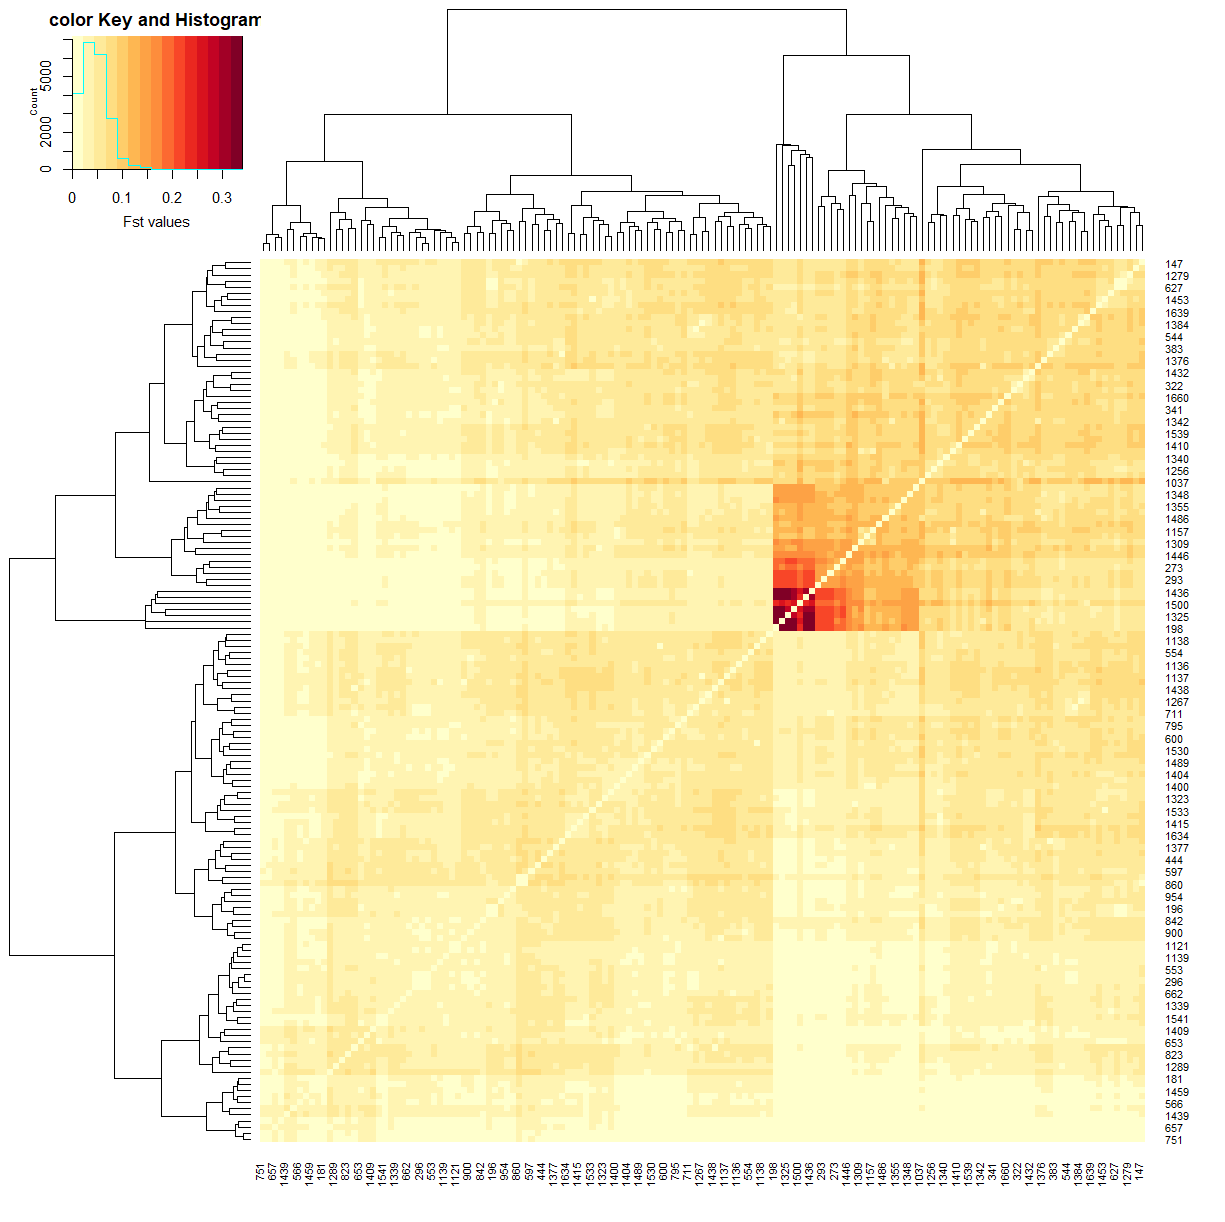


Figure S7b. Heatmap and dendrogram based on pairwise FST values among the active herds of Red Mangalica breed. The heatmap color key and histogram represents the FST matrix considering different discrete FST scales.

Figure S7a. Heatmap and dendrogram based on pairwise FST values among the herds of Red Mangalica breed. The heatmap color key and histogram represents the FST matrix considering different discrete FST scales.

| 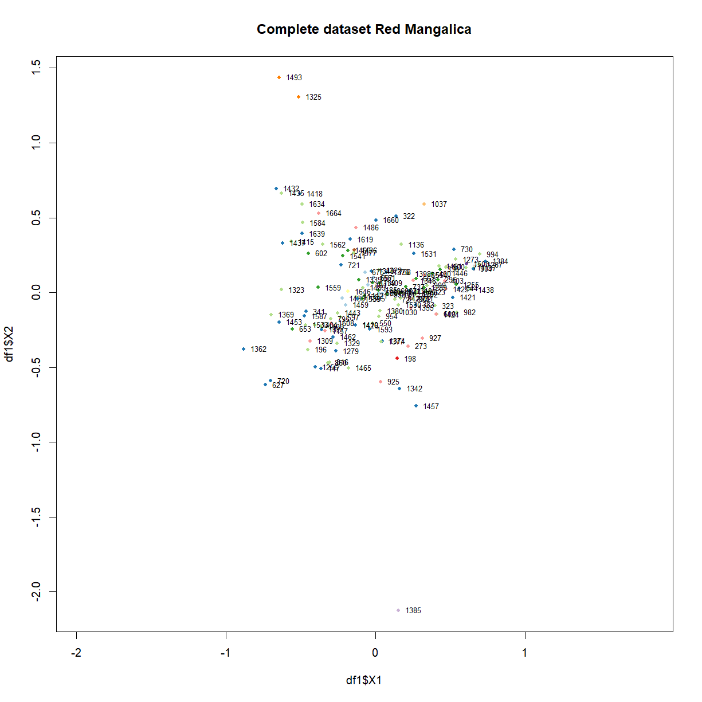  Figure S8a. Multidimensional scaling (MDS) clusters (MDS1&MDS2) of the Red Mangalica | 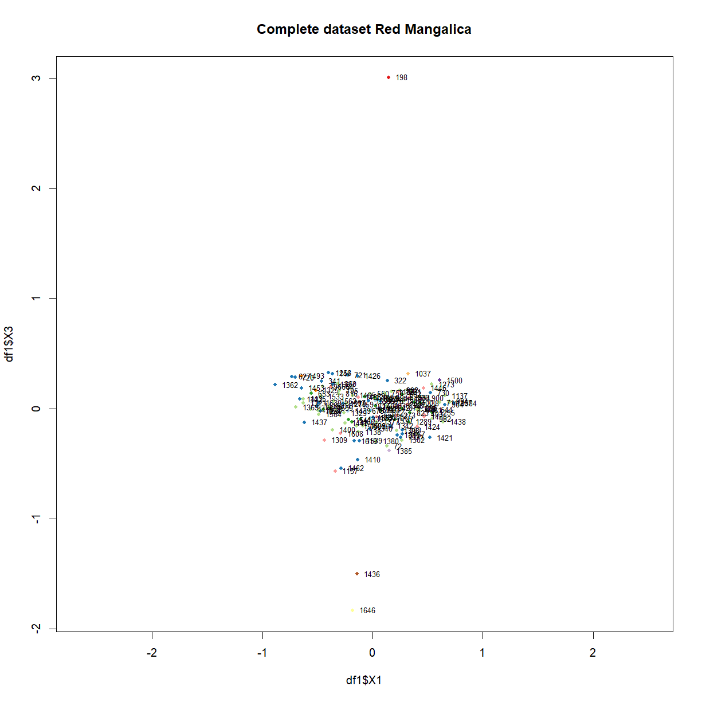  Figure S8b. Multidimensional scaling (MDS) clusters (MDS1&MDS3) of the Red Mangalica |
| --- | --- |
| 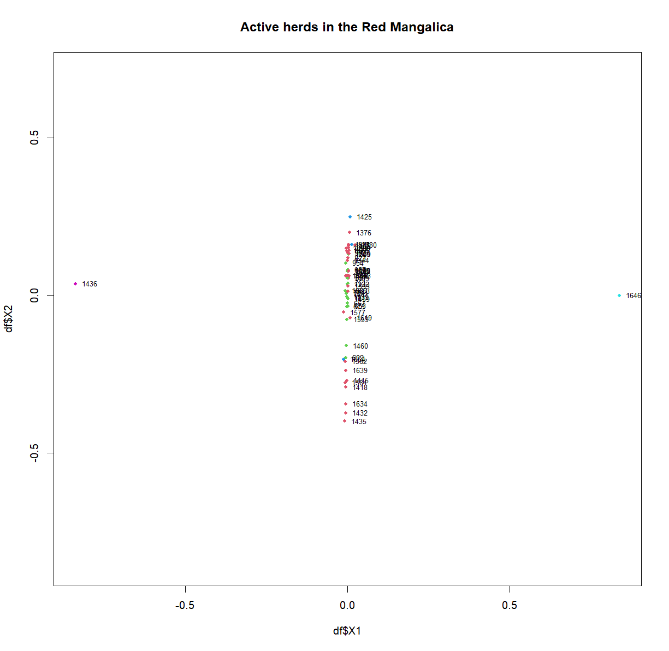  Figure S8c. Multidimensional scaling (MDS) clusters (MDS1&MDS2) of active herds in the Red Mangalica | 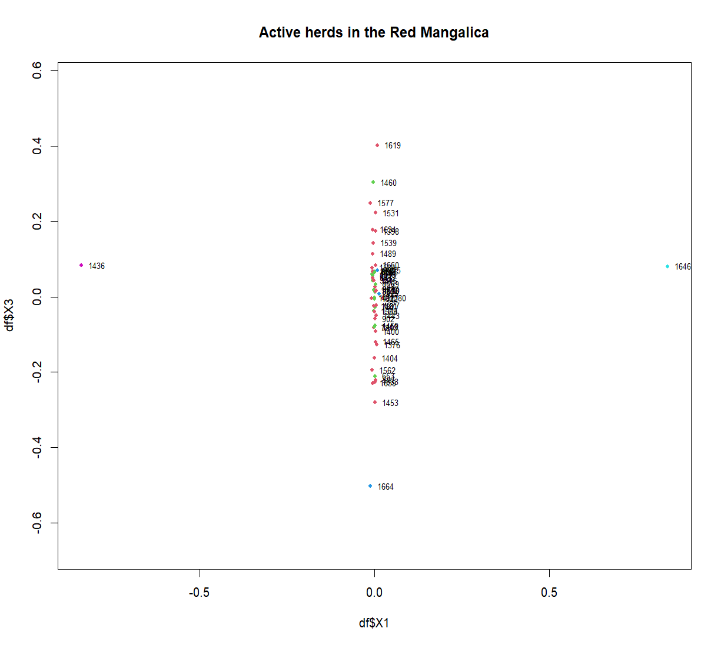  Figure S8d. Multidimensional scaling (MDS) clusters (MDS1&MDS3) of active herds in the Red Mangalica |

| 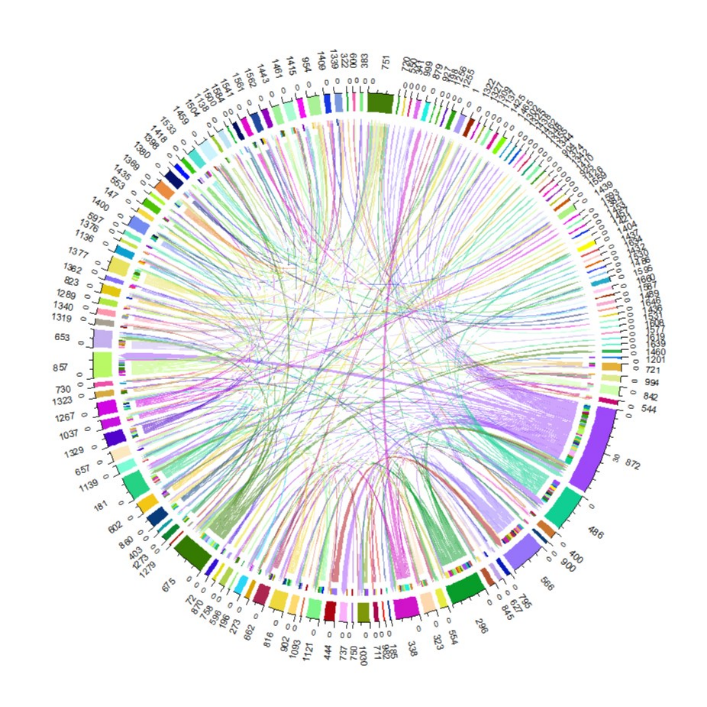  Figure S9a. Male migration intensity among the Red's total herds | 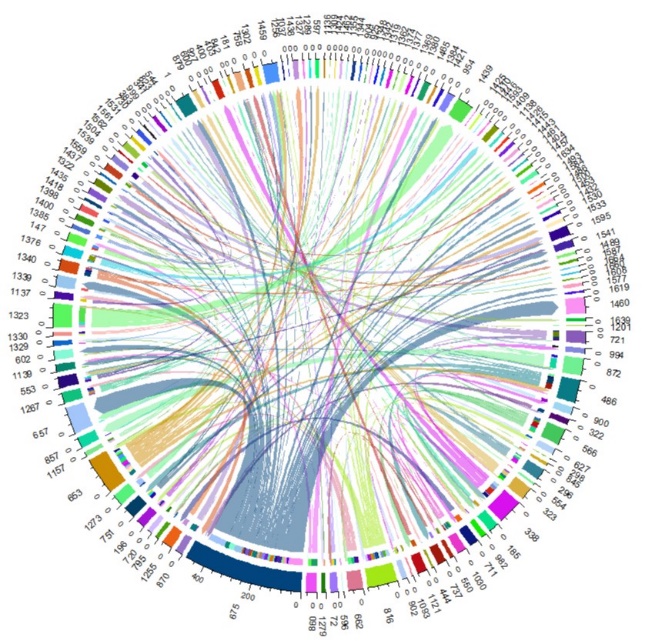  Figure S9b. Female migration intensity among the Red's total herds |
| --- | --- |
| 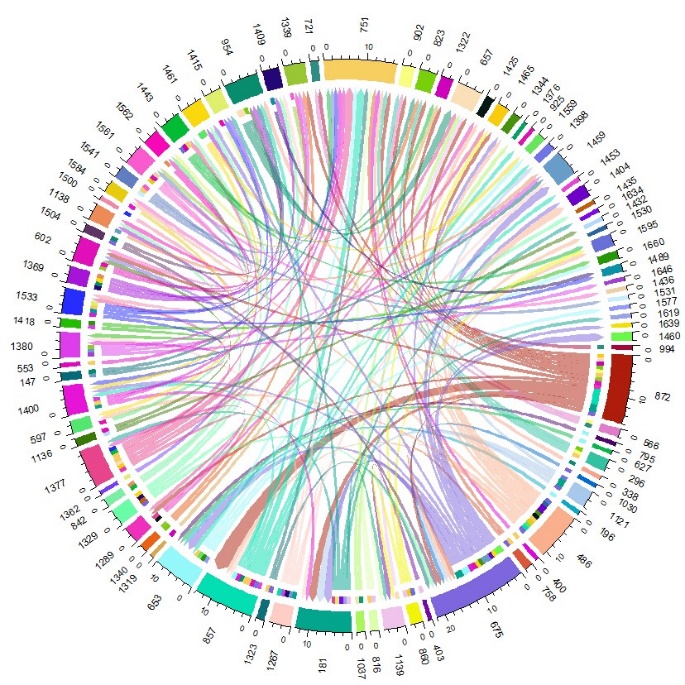  Figure S9c. Male migration intensity among the Red's active herds | 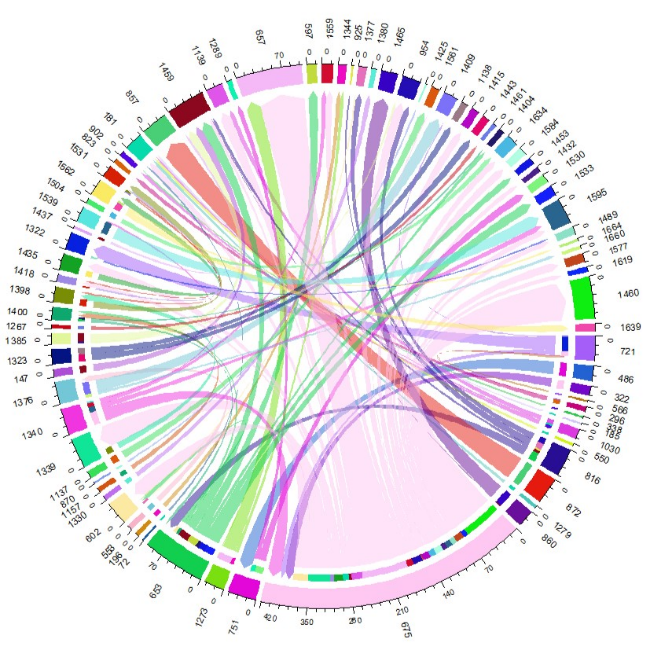  Figure S9d. Female migration intensity of the Red's active herds |
